# Supplementary material for: A common theme in extracellular fluids of beetles: extracellular superoxide dismutases crucial for balancing ROS in response to microbial challenge
Source: PubMed Central journal article supplement (PMC4828634; doi:10.1038/srep24082), 2016-04-12
Supplement: srep24082-s1.pdf [file srep24082-s1.pdf]

## Supplementary material: figures and tables

### **A common theme in extracellular fluids of beetles: extracellular superoxide dismutases crucial for balancing ROS in response to microbial challenge**

René R. Gretscher<sup>a</sup>, Priska E. Streicher<sup>a</sup>, Anja S. Strauß<sup>a</sup>, Natalie Wielsch<sup>b</sup>, Magdalena Stock<sup>a</sup>, Ding Wang<sup>a</sup>, Wilhelm Boland<sup>a</sup> and Antje Burse<sup>a\*</sup>

<sup>a</sup> Department of Bioorganic Chemistry, Max-Planck-Institute for Chemical Ecology, Hans-Knoell-Str. 8, D-07745 Jena, Germany

<sup>b</sup> Research Group Mass Spectrometry/Proteomics, Max Planck Institute for Chemical Ecology, Jena, Germany

\*Corresponding author. Phone: ++49(0) 3641-571265, Fax: ++49(0) 3641-571202, E-mail: aburse@ice.mpg.de

SUPPLEMENTARY FIGURES

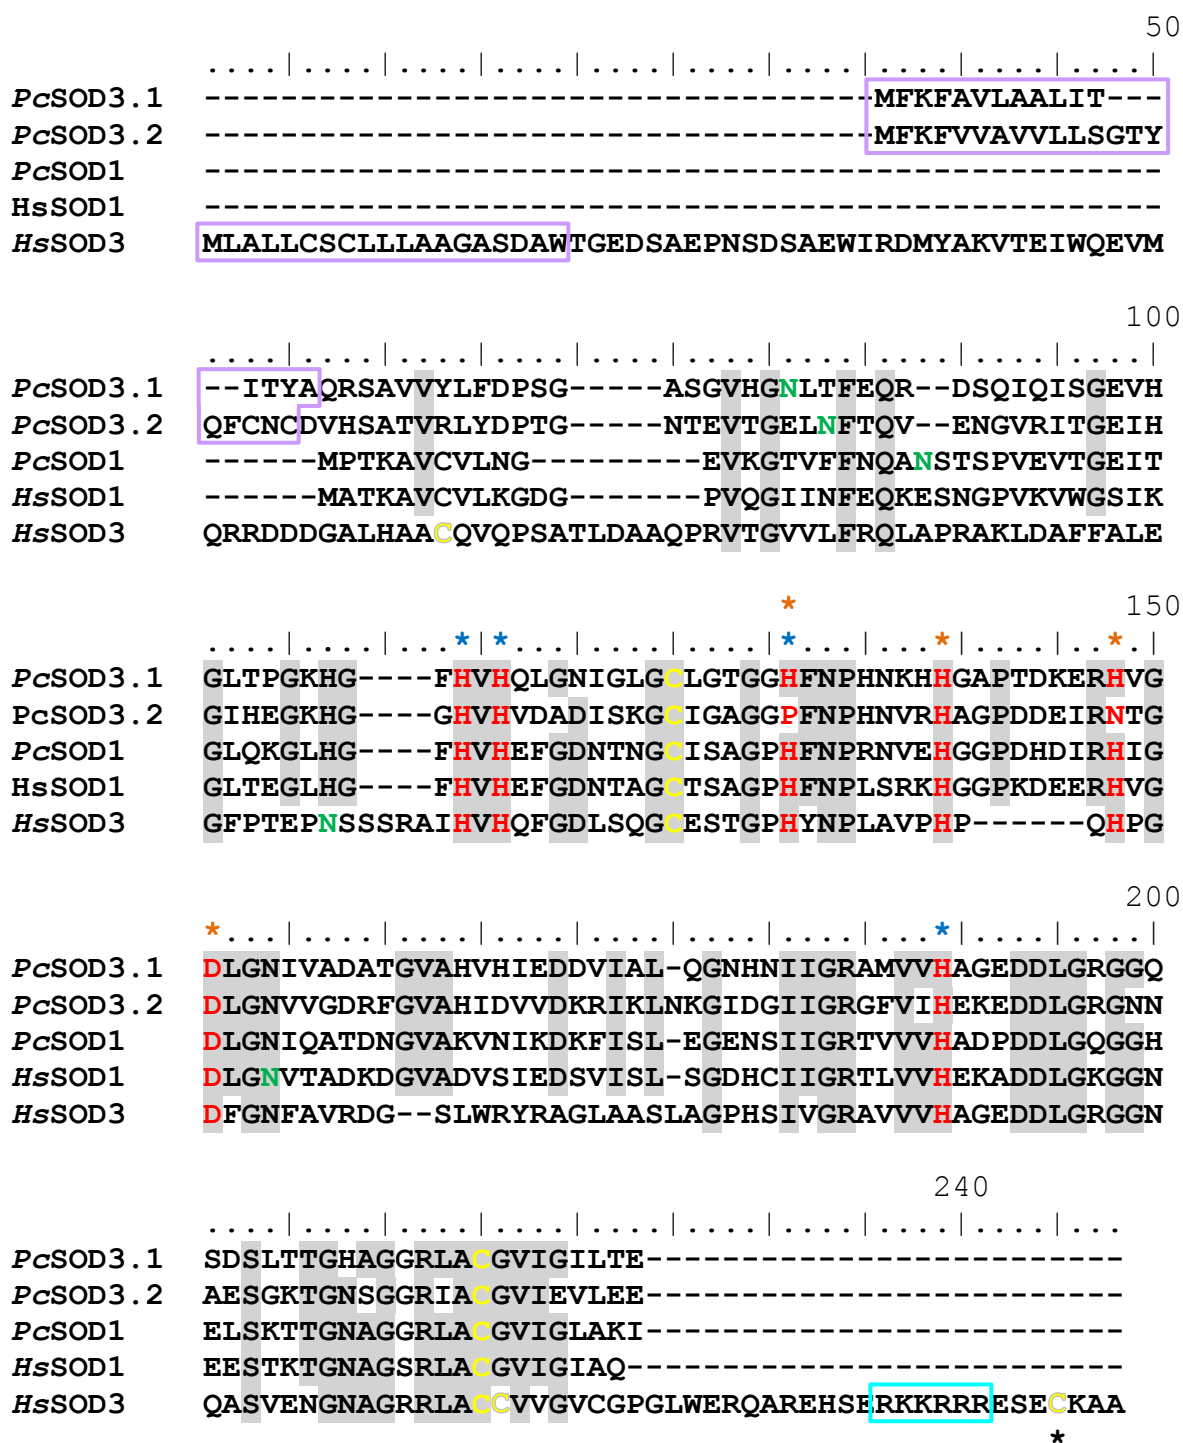

Figure S1. Multiple sequence alignment of Cu,Zn-SODs from *P. cochleariae* and *H. sapiens* (SOD1, P00441; SOD3, P08294). Red amino acid residues, metal cation binding and catalysis; yellow residues, cysteine involved in disulfide bridges; green residues, N-glycosylation sites; pink box, signal peptide; torques box, heparin binding region; blue stars, Cu<sup>2+</sup>-binding; orange stars, Zn<sup>2+</sup>-binding; black star, position of the *HsSOD3* Cys residue involved in the intersubunit disulfide bridge.

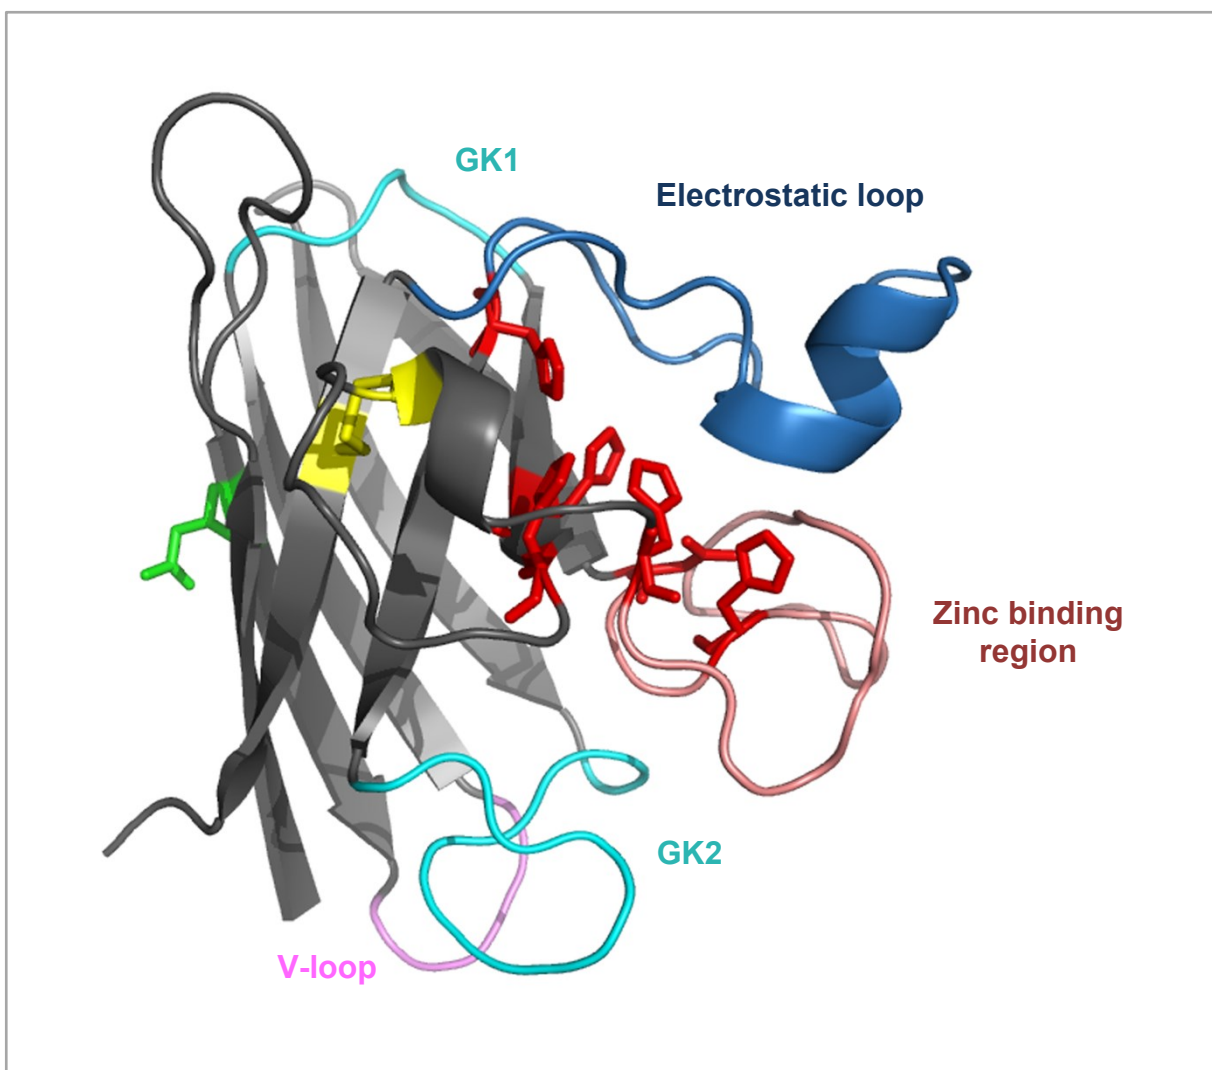

**Figure S2.** Comparison of the predicted tertiary structure of *PcSOD3.1* with the solved *HsSOD1* (Uniprot P00441) structure 1HL5 chain A by using Phyre2 (Kelley and Sternberg, 2009). Beta-Strands are displayed as flat arrows, and helices are displayed as ribbons. Amino acid residues ligating metal ions in the active center are shown as red sticks. Key structural elements are color-coded (Perry et al., 2010): dark blue, electrostatic loop (A138-R160) contains charged amino acid residues guiding negatively charged substrates to the active site entrance); light blue, GK1 (G54-G58) and GK2 (D119-I129), Greek key loops 1 and 2; yellow, S-S, disulfide bridge (C74 and C163); purple, V-loop (R42-Q45), variable loop ; light red, Zn<sup>2+</sup> binding region (H80-D100); green, asparagine residue (N 36) for N-glycosylation.

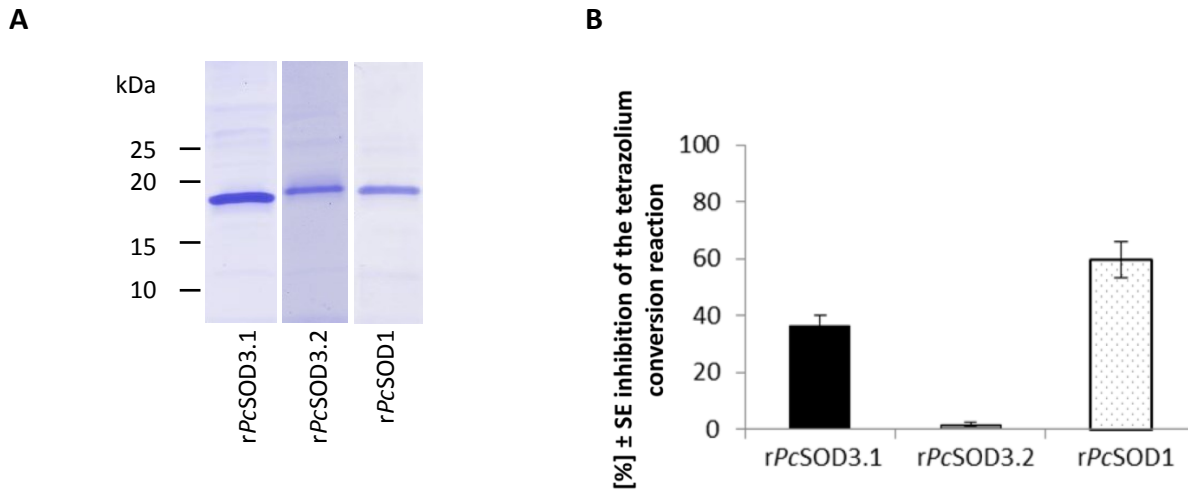

**Figure S3. *In vitro* activities of purified recombinant *PcSODs*.** **A**, purified r*PcSODs* after heterologous expression in *E. coli* cells, left: elution fraction, stained with Coomassie blue. **B**, 4  $\mu\text{g}$  of purified protein each was used for the SOD activity assays. SOD activity was determined colorimetrically at 440 nm as the inhibition of the reduction of the tetrazolium salt, WST-1. (n=3)

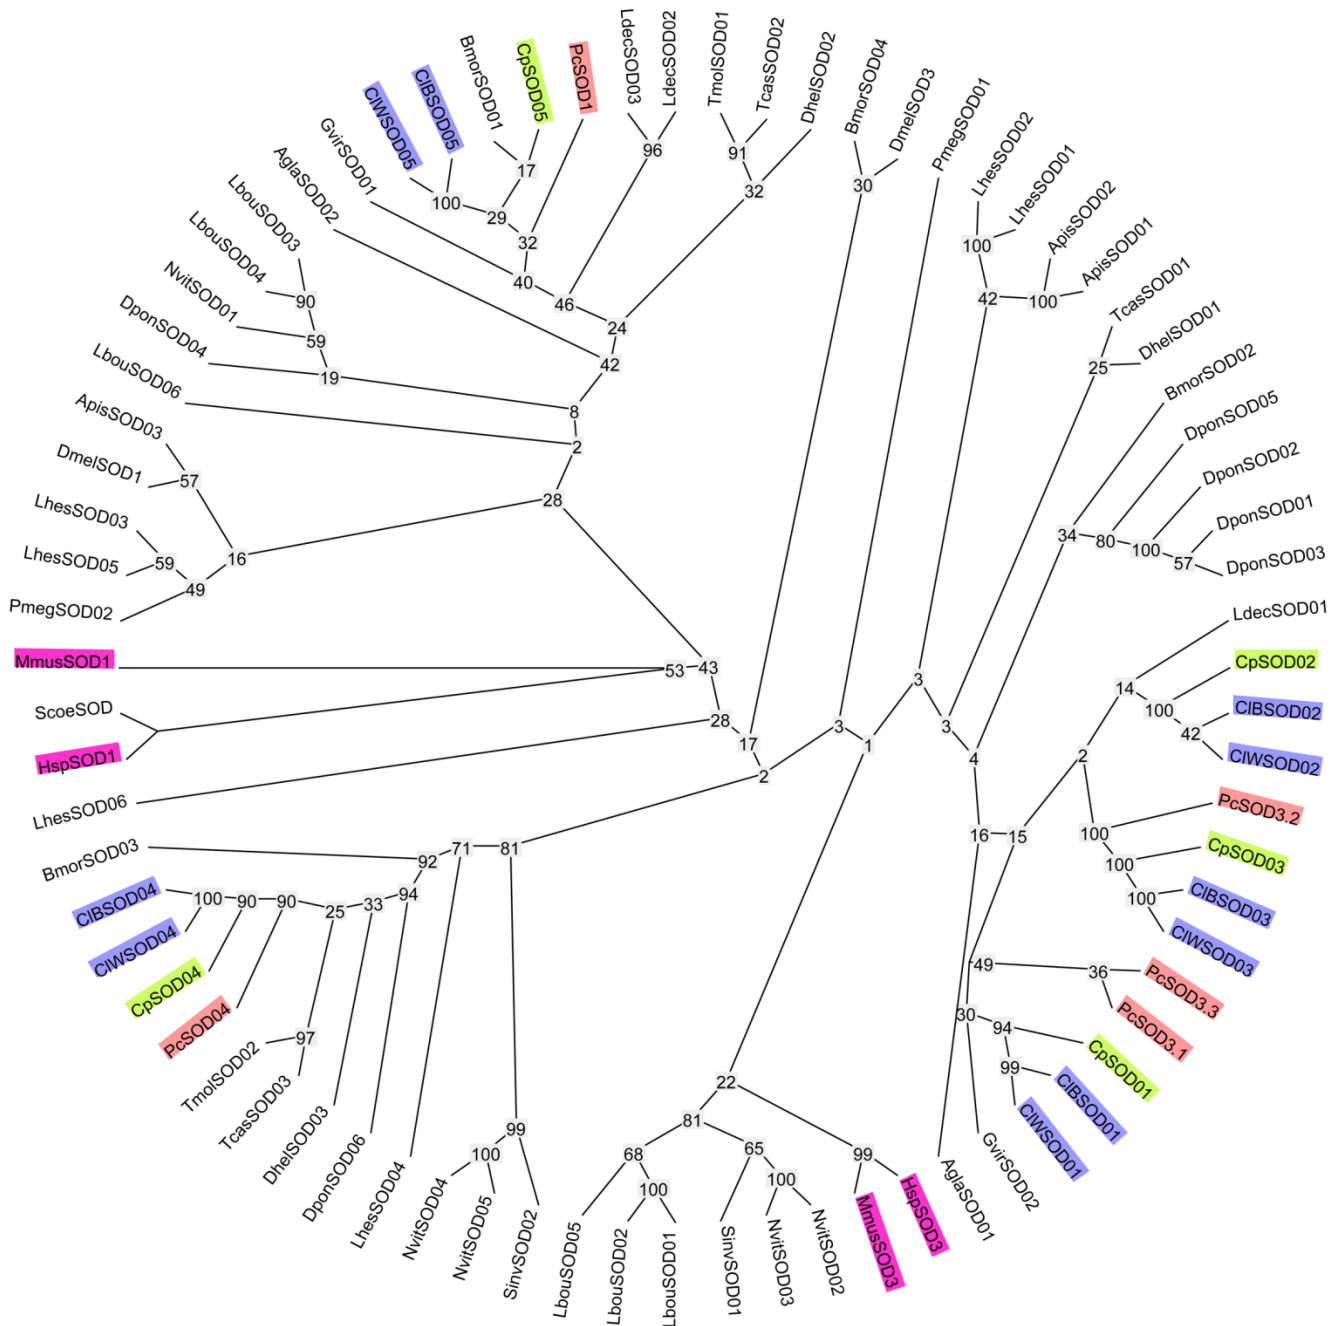

**Figure S4A. Phylogenetic tree of SOD1 and SOD3 of selected insect species.** Red, *P. cochleariae* (Pc); green, *C. populi* (Cp); blue, *C. lapponica* (CIW, willow-feeder; CIB, birch-feeder); orange, *H. sapiens* (Hsp) and *M. musculus* (Mmus). Numbers at nodes are bootstrap values. Corresponding accession numbers are listed in table S2.

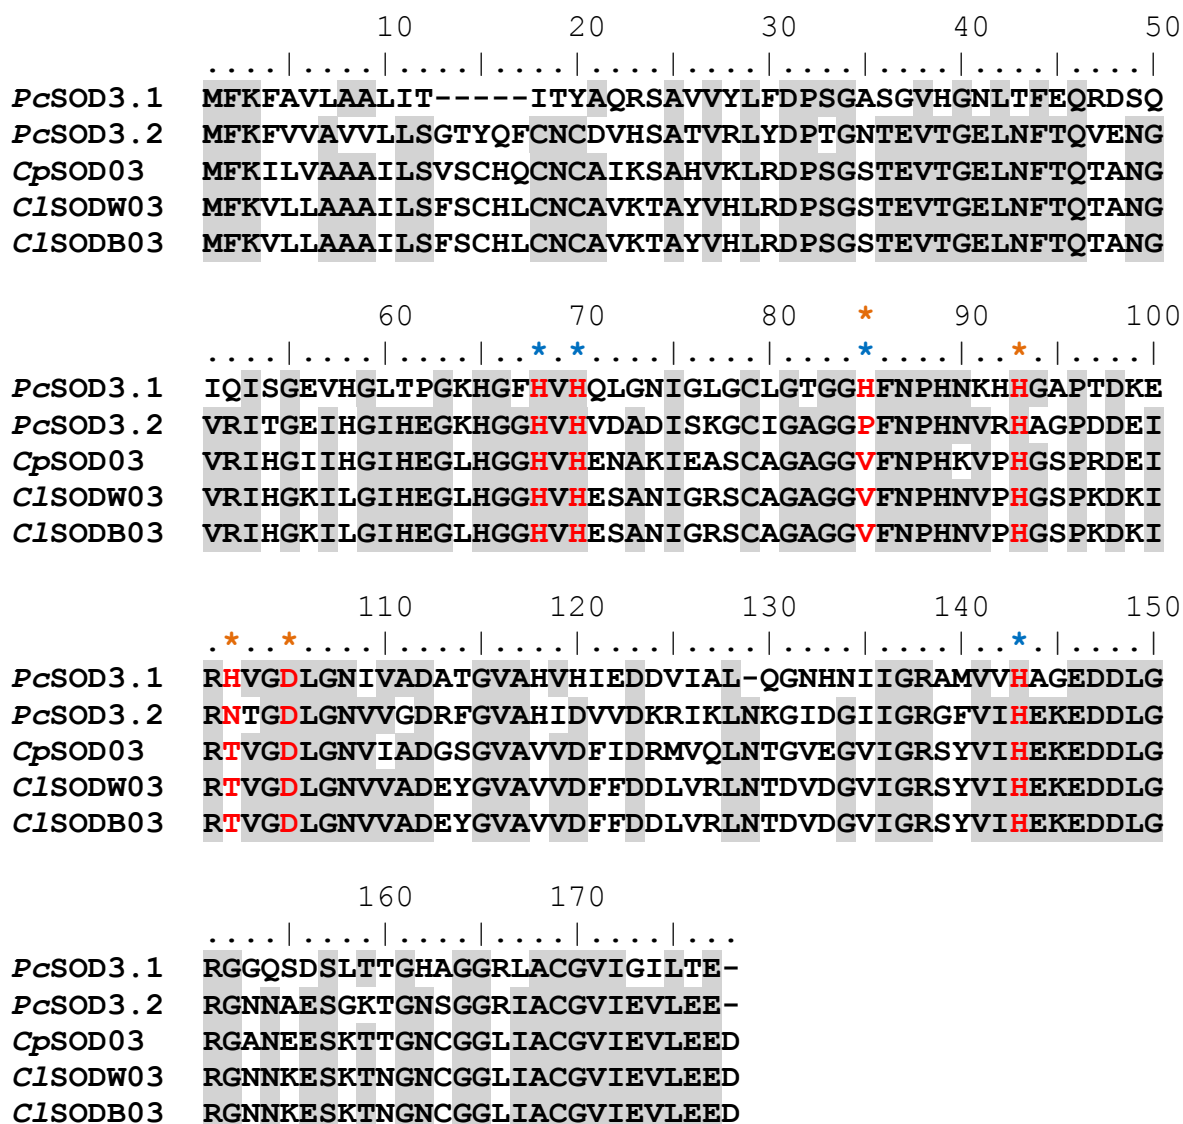

**Figure S4B. Multiple sequence alignment of extracellular Cu,Zn-SODs from *Chrysomelina* species.** Red amino acid residues, metal cation binding and catalysis; blue stars, Cu<sup>2+</sup>-binding; orange stars, Zn<sup>2+</sup>-binding.

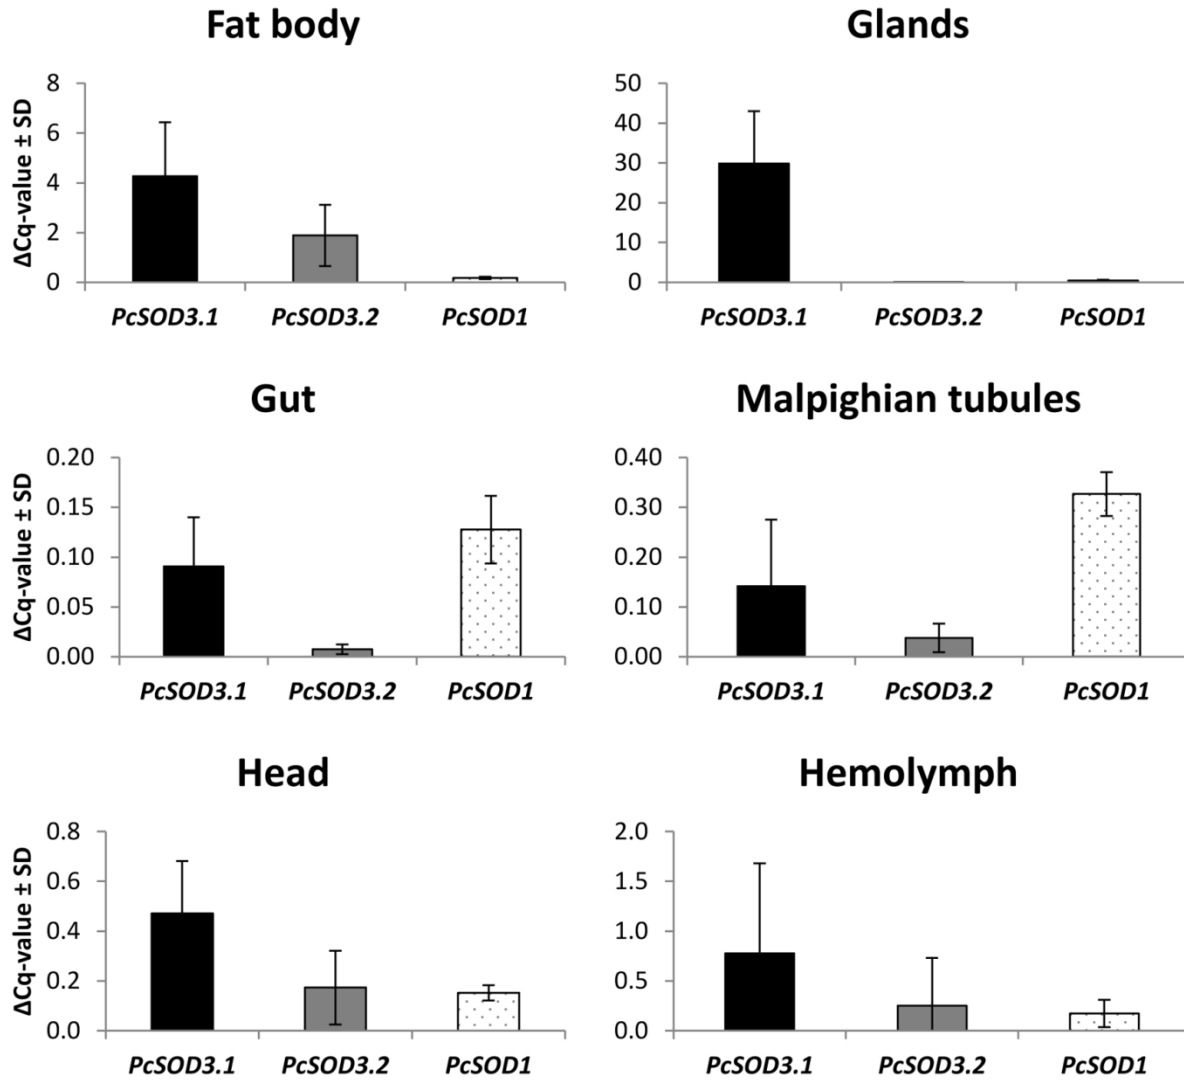

**Figure S5. Relative normalized expression levels of *PcSODs* in different tissues of third-instar *P. cochleariae* larvae.** Tissues of 3 larvae were pooled for one sample. 4-12 biological replicates were examined. Reference genes were *Pcrps3* and *Pcrpl6*.

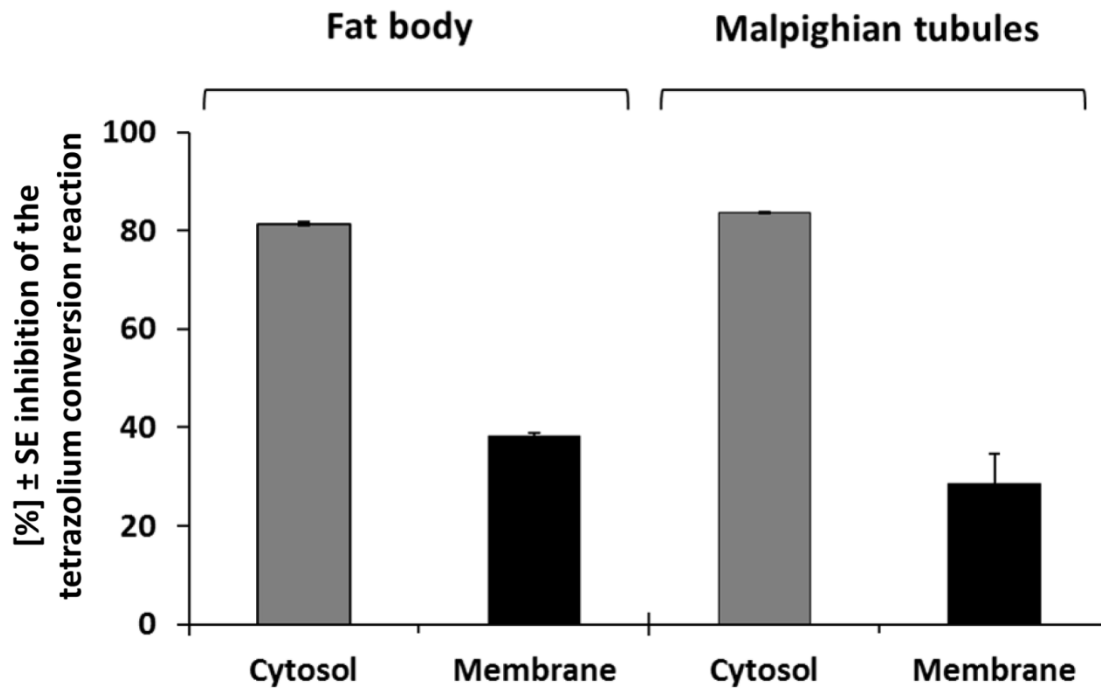

**Figure S6. SOD activity after protein isolation.** Tissues from six third-instar larvae of *P. cochleariae* were pooled in one sample and proteins were separated into cytosolic and membrane enriched fractions according to the protocol of the Calbiochem ProteoExtract Native Membrane Protein Extraction Kit (Millipore). Protein concentration was measured with bicinchoninic acid protein assay and 6  $\mu\text{g}$  of total protein was used for the SOD activity assay. SOD activity was determined colorimetrically at 440 nm as the inhibition of the reduction of the tetrazolium salt, WST-1. (n=3)



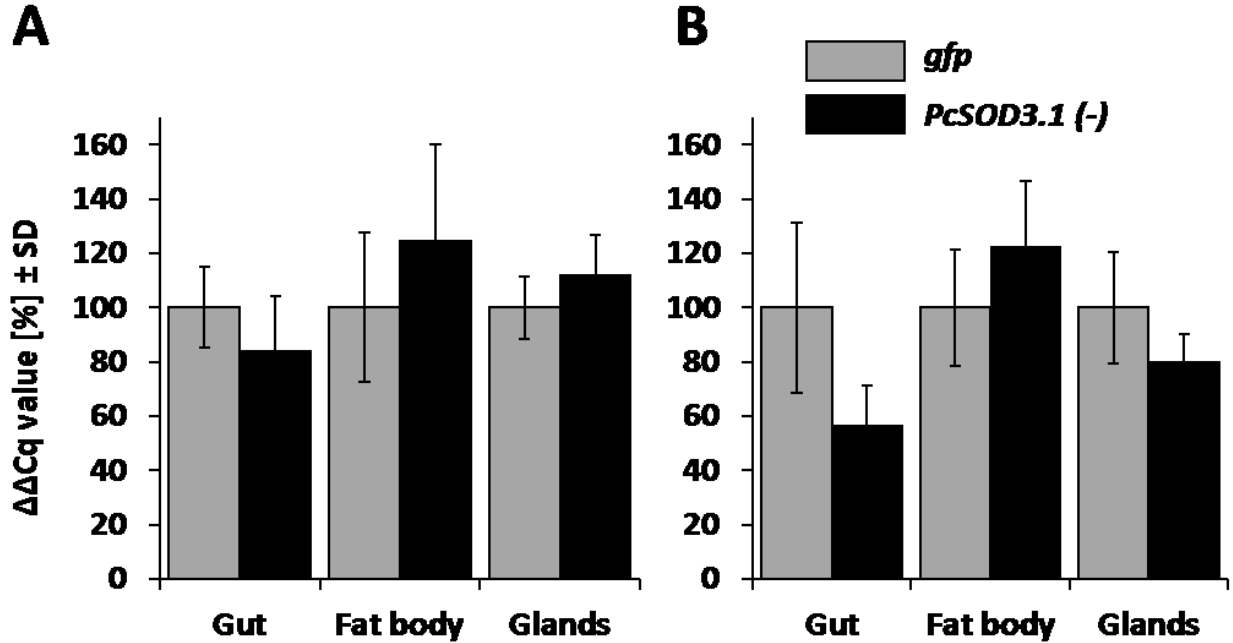

**Figure S7. Silencing effects on *PcSOD3.1* expression in different tissues of the larval F1-generation after RNAi induction in the parent generation.** A, *P. cochleariae* third-instar larvae were injected with 500 ng of *PcSOD3.1*-dsRNA or *gfp*-dsRNA and mRNA levels were assayed in larvae of the next generation. B, *P. cochleariae* pupae were injected with 4  $\mu$ g of *PcSOD3.1*-dsRNA or *gfp*-dsRNA and mRNA levels were assayed in larvae of the next generation. Reference genes were *PcRPS3* and *PcRPL6*. The  $\Delta$ Cq values of *SOD*-silenced samples have been normalized to the  $\Delta$ Cq values of the *gfp*-injected samples ( $\Delta\Delta$ Cq). (n=3)

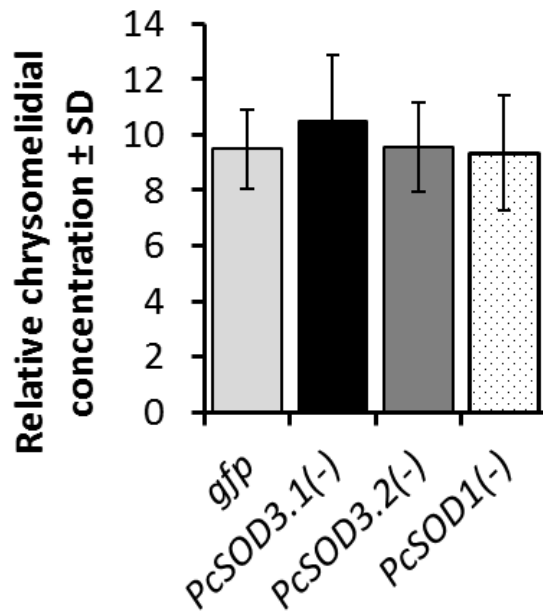

**Figure S8. Effect of Cu/Zn SOD silencing on the chrysolimbal synthesis in *P. cochleariae* larvae.** GC/MS analysis of secretions was carried out six days after triggering RNAi. The amount of chrysolimbal was normalized to the internal standard methylbenzoate. (n=5)

|                           |          | <i>PcSOD3.1</i> | <i>PcSOD3.2</i> | <i>PcSOD1</i> |
|---------------------------|----------|-----------------|-----------------|---------------|
| <b><i>PcSOD3.1(-)</i></b> | Gut      | 1,62            | 189,30          | 97,29         |
|                           | Fat body | 0,07            | 108,55          | 85,82         |
|                           | MPT      | 3,30            | 49,69           | 98,54         |
|                           | Glands   | 0,65            | 177,77          | 87,59         |
| <b><i>PcSOD3.2(-)</i></b> | Gut      | 124,12          | 33,98           | 56,73         |
|                           | Fat body | 24,75           | 1,90            | 81,29         |
|                           | MPT      | 96,74           | 2,38            | 49,94         |
|                           | Glands   | 99,04           | 19,61           | 43,98         |
| <b><i>PcSOD1(-)</i></b>   | Gut      | 55,31           | 261,07          | 6,01          |
|                           | Fat body | 236,28          | 373,94          | 6,57          |
|                           | MPT      | 43,77           | 20,81           | 8,48          |
|                           | Glands   | 110,40          | 65,53           | 0,44          |

**Figure S9. Expression of Cu/Zn SODs genes after their individual silencing by RNAi in juvenile *P. cochleariae*.** 200 ng dsRNA of each Cu/Zn SOD or *gfp* has been used to induce RNAi in early second-instar larvae. RNA from different tissues of *P. cochleariae* larvae has been used as template ten days after ds RNA injection. Reference genes were *PcRPS3* and *PcRPL6*. The  $\Delta Cq$  values of *SOD*-silenced samples have been normalized to the  $\Delta Cq$  values of the *gfp*-injected samples ( $\Delta\Delta Cq$ ). Green: decreased expression level, red: increased expression level. (%means of n=3/treatment)

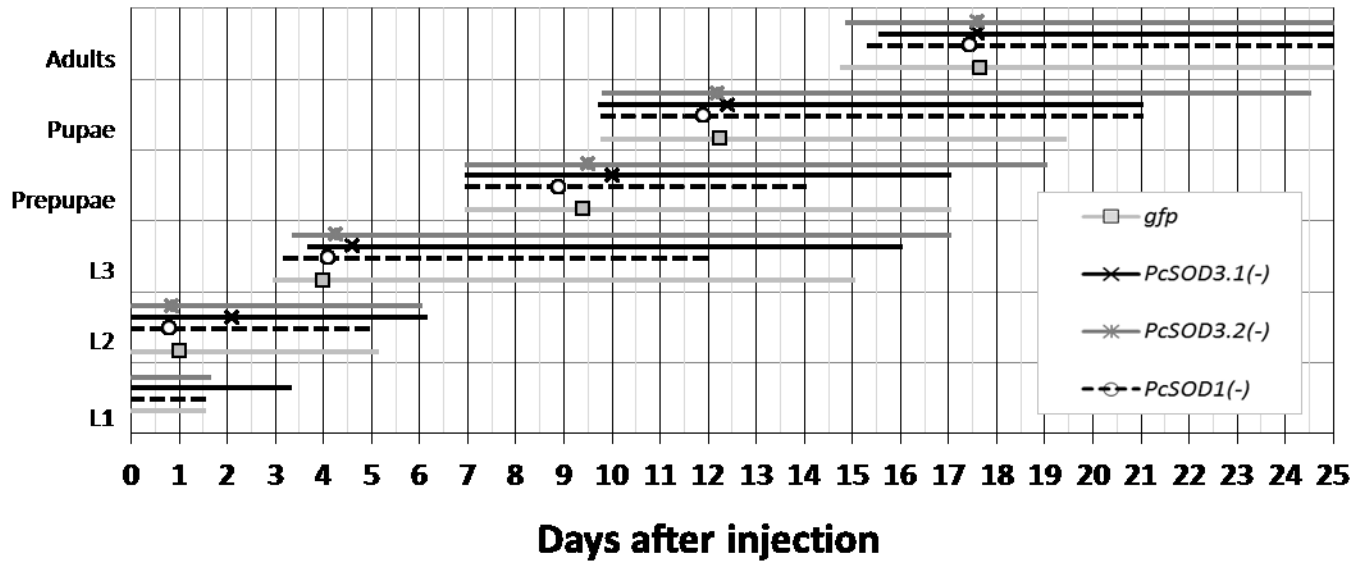

**Figure S10.** Graphical representation of life stage development of *P. cochleariae*. First-instar larvae were injected with 200 ng of *PcSOD3.1-*, *PcSOD3.2-*, *PcSOD1*-dsRNA or *gfp*-dsRNA. Markers indicate 50% of population in this state, lines represent first and last turnover. L1-L3, larval instars.

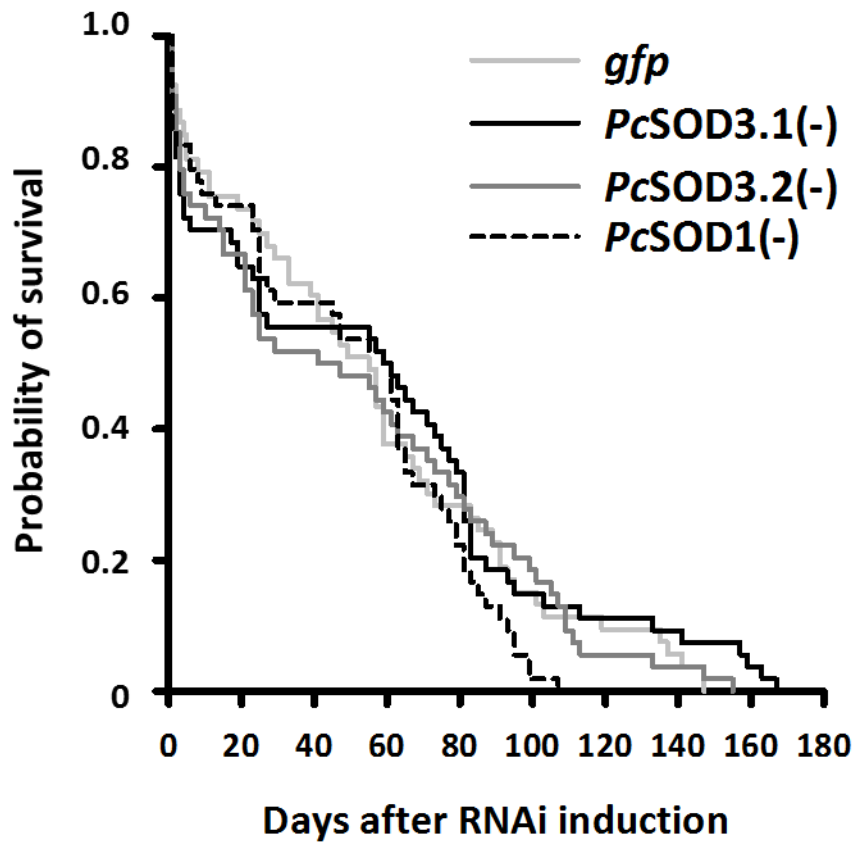

**Figure S11. Longevity of *P. cochleariae* after silencing of Cu/Zn SODs by RNAi.** The probability of survival is depicted as Kaplan-Meier curves by applying Gehan-Breslow statistic test. Second-instar larvae were injected with 200 ng of *PcSOD3.1-*, *PcSOD3.2-*, *PcSOD1*-dsRNA or *gfp*-dsRNA (n=60/treatment).

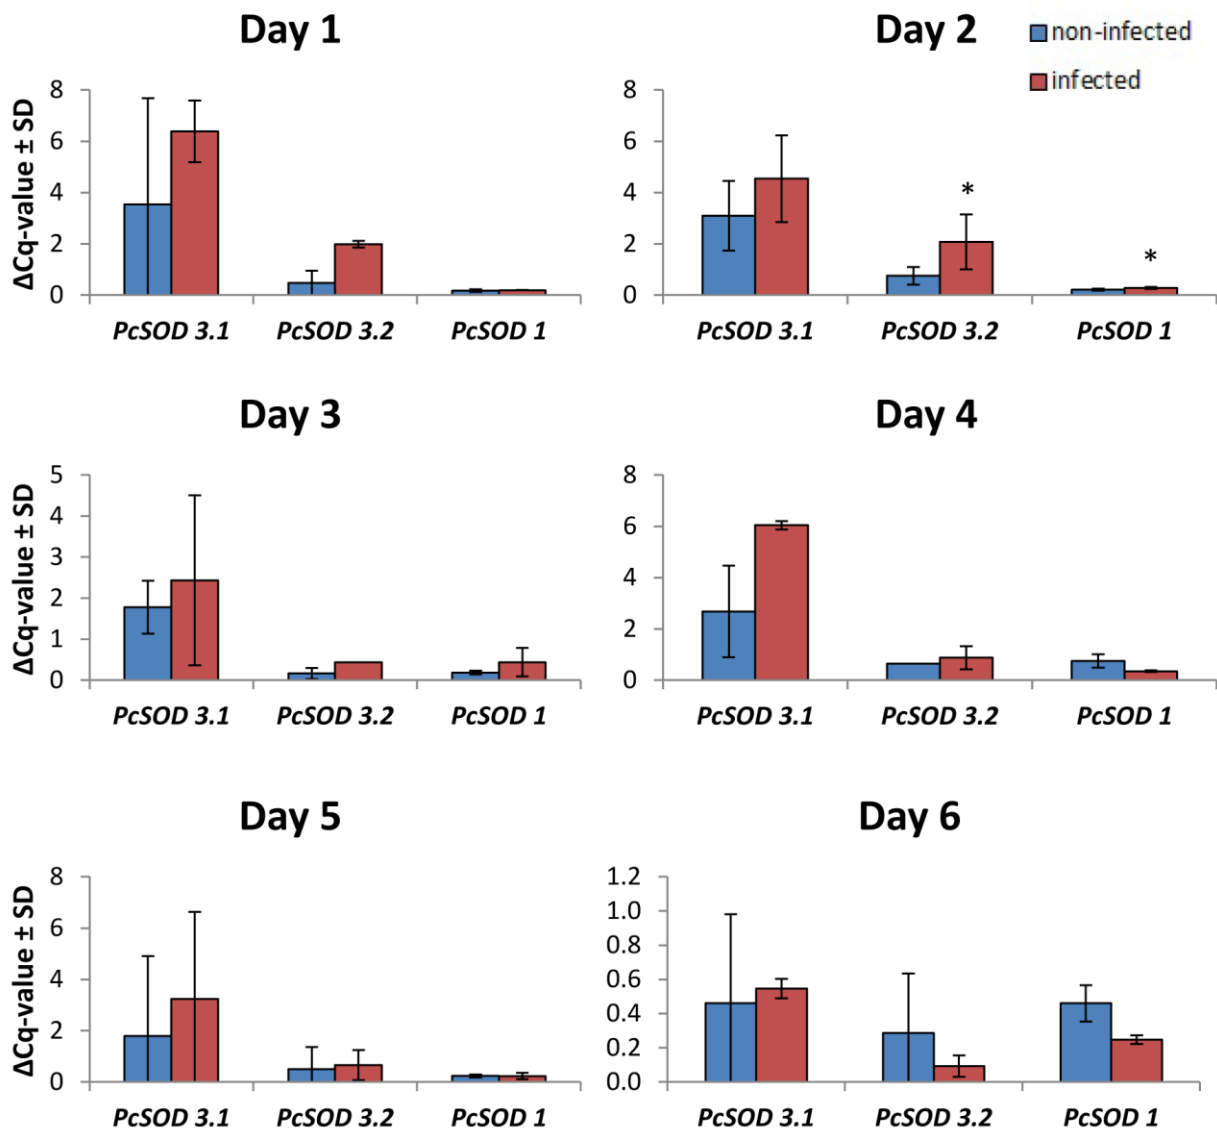

**Figure S12. Relative normalized expression levels of *sod*'s in whole third-instar *P. cochleariae* larvae 1 to 6 days after infection with *M. anisopliae*.** Non-infected and infected larvae in comparison, 1 to 6 biological replicates of whole larvae were examined. Reference genes were *PcRPS3* and *PcRPL6*. \* = significantly different to their non-infected group ( $p < 0.05$ , two-tailed t-test).

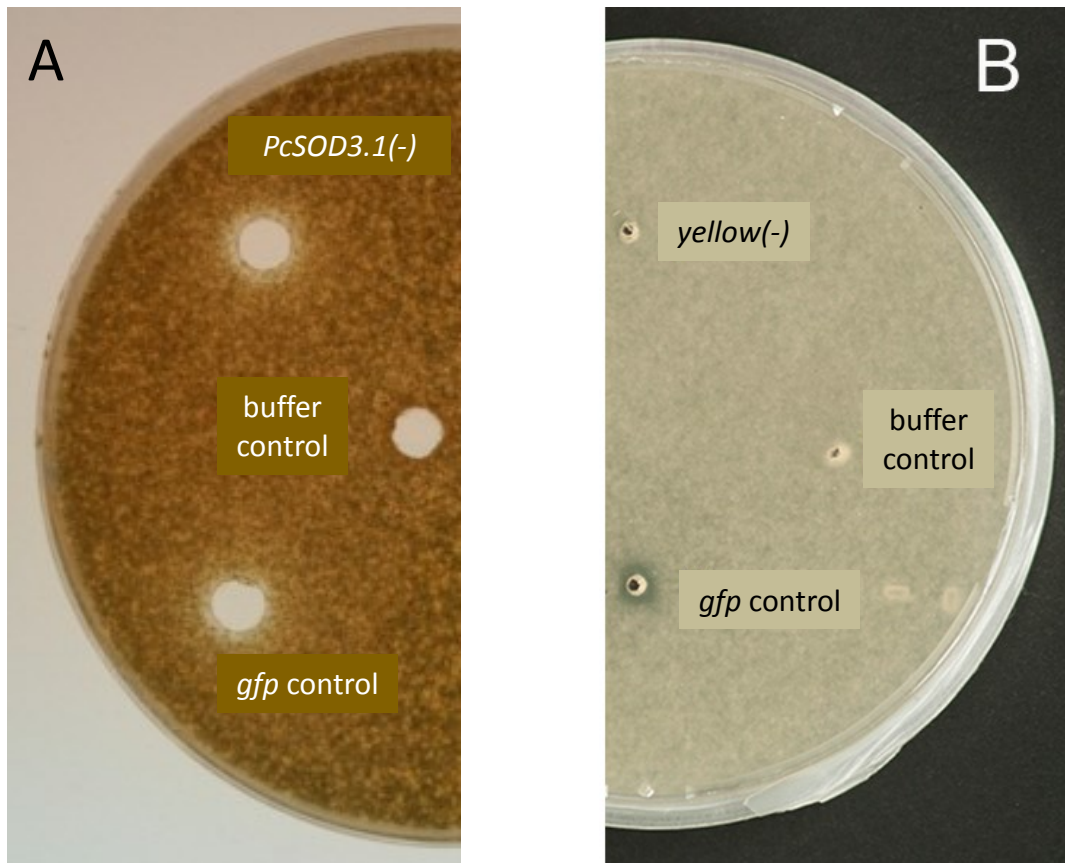

**Figure S13. Effect of defensive secretions from juvenile *P. cochleariae* on the growth of *Metarhizium anisopliae* in agar diffusion tests after three days of incubation. A, Effect of secretions collected from *PcSOD3.1* silenced larvae (1:10 (w/v) in 50 mM NaPO<sub>4</sub> pH 5.8, 10  $\mu$ l per spot); B, Effect of secretions collected from *yellow* silenced larvae. (1:30 (w/v) in 50 mM NaPO<sub>4</sub> pH 5.8, 5  $\mu$ l per spot).**

Kelley, L.A., Sternberg, M.J.E., 2009. Protein structure prediction on the Web: a case study using the Phyre server. Nat. Protoc. 4, 363-371.

Perry, J.J.P., Shin, D.S., Getzoff, E.D., Tainer, J.A., 2010. The structural biochemistry of the superoxide dismutases. Biochim. Biophys. Acta 1804, 245-262.

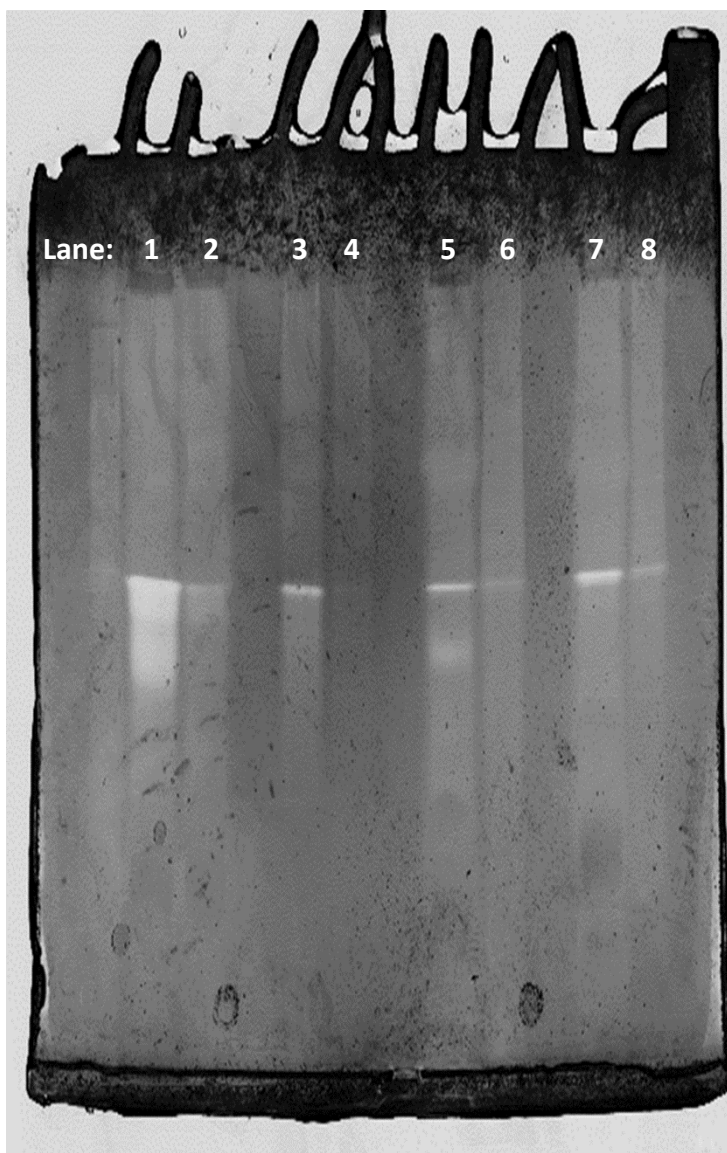

**Figure S14. Full-length gel corresponds to figure 1A in the main text.** It shows the detection of SOD activity in defensive exudates and hemolymph collected from larvae of different leaf beetle species. From each species 1  $\mu$ l hemolymph and 0.3  $\mu$ l secretion was separated on native PAGE and functionally stained for SOD activity by using a qualitative zymography method based on the conversion of the tetrazolium salt, MTT. SOD activity inhibits the formation of a dark blue formazane dye and corresponds to white bands on a dark background.

Lane 1/2, *P. cochleariae*, hemolymph/secretion; lane 3/4, bovine erythrocyte SOD; lane 5/6, *Gastrophysa viridula*, hemolymph/ secretion; lane 7/8, *Chrysomela populi*, hemolymph/ secretion.



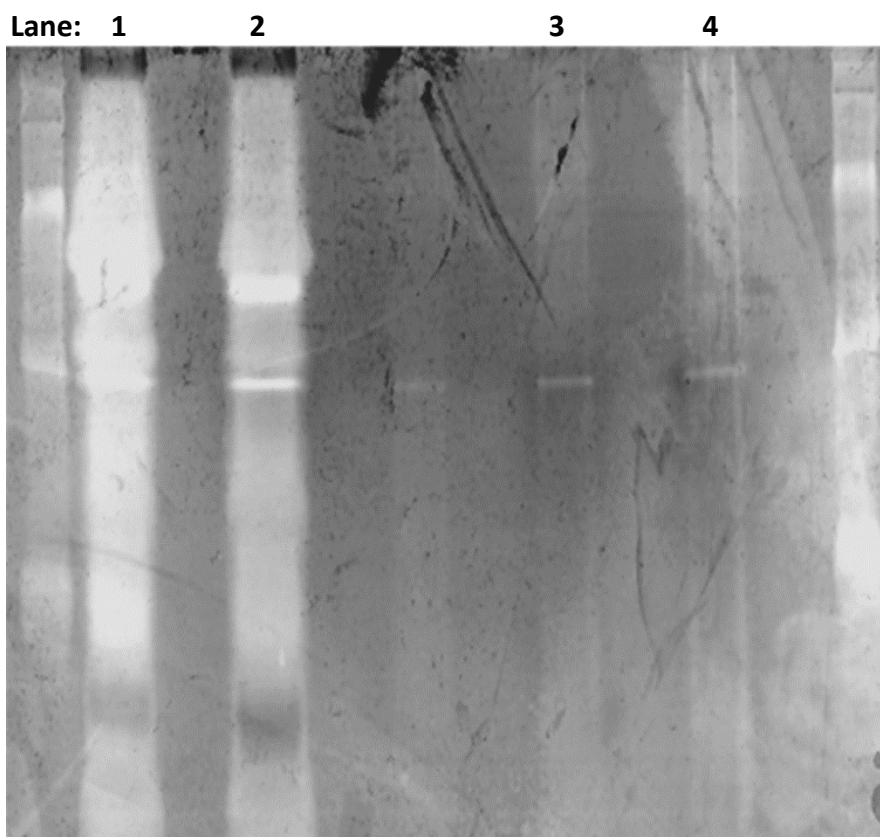

**Figure S15. Full-length gel corresponds to figure 1A in the main text.** It shows the detection of SOD activity in defensive exudates and hemolymph collected from larvae of *Chrysomela lapponica* (*C. lapp.*) One  $\mu\text{l}$  hemolymph and 0.3  $\mu\text{l}$  secretion was separated on native PAGE and functionally stained for SOD activity by using a qualitative zymography method based on the conversion of the tetrazolium salt, MTT. SOD activity inhibits the formation of a dark blue formazane dye and corresponds to white bands on a dark background.

Lane 1, *C. lapp.* affiliated to *Salix* ssp., hemolymph; lane 2, *C. lapp.* affiliated to *Betula* ssp., hemolymph; lane 3, *C. lapp.* affiliated to *Salix* ssp., secretion; lane 4, *C. lapp.* affiliated to *Betula* ssp., secretion.

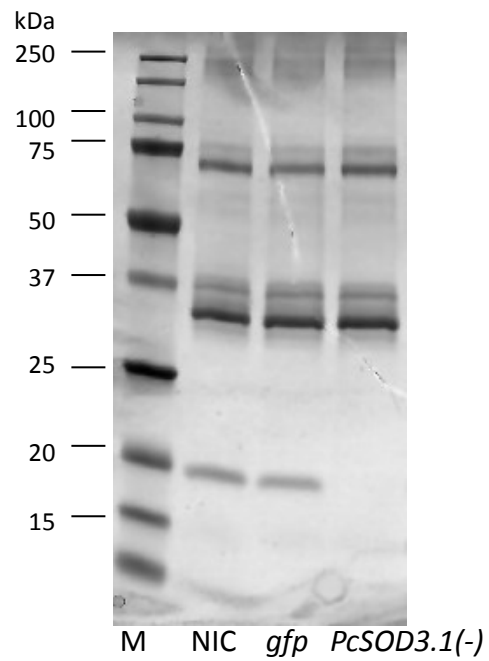

**Figure S16. Full-length gel corresponds to figure 2C in the main text.** Coomassie stained SDS-PAGE with 0.3  $\mu$ l of larval defence secretions from *P. cochleariae* nine days after RNAi induction. Injection was carried out with 200 ng *PcSOD3.1*-dsRNA or 200 ng *gfp* as a control. M, marker (Bio-Rad Laboratories, Munich, Germany); NIC, non-injection control.

## SUPPLEMENTARY TABLES

**Table S1. Peptides identified from superoxide dismutases from juvenile *P. cochleariae*.**

### Peptides identified from *PcSOD 3.1* in hemolymph.

| peptide sequence <sup>a</sup>        | theor. [M+H] <sup>+</sup> <sup>b</sup> | exp. [M+H] <sup>+</sup> <sup>c</sup> | mass error (ppm) | peptide score | retention time (min) |
|--------------------------------------|----------------------------------------|--------------------------------------|------------------|---------------|----------------------|
| DSQIQISGEVHGLTPGK                    | 1765.9177                              | 1765.9156                            | 4.4              | 8.0           | 33.07                |
| HVGDLGNIVADATGVAHVHIEDDVIALQGNHNIIGR | 3739.9205                              | 3739.9205                            | -1.6             | 7.8           | 43.86                |
| AMVVHAGEDDLGR                        | 1369.6487                              | 1369.6507                            | -1.6             | 7.7           | 26.37                |
| GGQSDSLTTGHAGGR                      | 1400.6741                              | 1400.6707                            | 13.9             | 6.3           | 25.34                |
| AM <sub>ox</sub> VVHAGEDDLGR         | 1385.6495                              | 1385.6515                            | 2.7              | 7.9           | 23.16                |

→ exemplary table of identified peptides from *PcSOD3.1* in hemolymph; results for defensive secretions are similar

### Peptides identified from *PcSOD 3.2* in hemolymph.

| peptide sequence <sup>a</sup> | theor. [M+H] <sup>+</sup> <sup>b</sup> | exp. [M+H] <sup>+</sup> <sup>c</sup> | mass error (ppm) | peptide score | retention time (min) |
|-------------------------------|----------------------------------------|--------------------------------------|------------------|---------------|----------------------|
| NTGDLGNVVGDR                  | 1216.6014                              | 1216.5986                            | 5.7              | 7.9           | 28.06                |
| FGVAHIDVVDKR                  | 1355.7344                              | 1355.7367                            | -4.7             | 7.7           | 30.36                |
| ITGEIHGHEGK                   | 1290.6637                              | 1290.6663                            | -10.7            | 7.6           | 21.63                |
| GIDGIIGR                      | 800.4588                               | 800.46                               | -3.1             | 7.5           | 31.62                |
| GC*IGAGGPFNPHNVR              | 1552.7408                              | 1552.7418                            | -1.3             | 7.3           | 29.52                |
| GNNAESGKTGNSGGR               | 1405.6543                              | 1405.6495                            | 5.7              | 6.1           | 29.74                |

### Peptides identified from *PcSOD1* in Malpighian tubules and fat body.

| peptide sequence <sup>a</sup> | theor. [M+H] <sup>+</sup> <sup>b</sup> | exp. [M+H] <sup>+</sup> <sup>c</sup> | mass error (ppm) | peptide score | retention time (min) |
|-------------------------------|----------------------------------------|--------------------------------------|------------------|---------------|----------------------|
| TVVVHADPDDLQGGHELSK           | 2074.0231                              | 2074.02                              | 1.5              | 6.4           | 28.96                |
| FISLEGENSIIGR                 | 1434.7636                              | 1434.7587                            | 3.4              | 6.2           | 40.59                |
| LAC*GVIGLAK                   | 1001.5863                              | 1001.5813                            | 4.9              | 6.2           | 33.78                |
| GTVFFNQANSTSPVEVTGEITGLQK     | 2624.3185                              | 2624.3202                            | -0.7             | 5.6           | 42.78                |
| HIGDLGNIQATDNGVAK             | 1722.893                               | 1722.8769                            | 9.3              | 5.4           | 43.38                |
| IYC*IVELGTESIIGNYNK           | 2233.118                               | 2233.121                             | -1.3             | 5.7           | 40.36                |

→ exemplary table of identified peptides from *PcSOD1* in Malpighian tubules; results for fat body are similar

<sup>a</sup> C\*, C-carbamidomethylation; Mox, M-oxidation

<sup>b</sup> theoretical monoisotopic mass of the peptide

<sup>c</sup> calculated monoisotopic mass of the lock-mass corrected peptide ion cluster

**Table S2. Low molecular proteins identified in hemolymph from juvenile *P. cochleariae*.**

| name    | similar to protein                      | fmol protein |                |                  |                      |
|---------|-----------------------------------------|--------------|----------------|------------------|----------------------|
|         |                                         | NIC          | <i>E. coli</i> | <i>M. luteus</i> | <i>M. anisopliae</i> |
| PcAMP01 | acaloleptin A (coleopteracin)           | 252.93       | 3354.64        | 884.15           | 1750.57              |
| PcAMP02 | attacin-like immune protein (attacin_C) | 27.89        | 1536.42        | 1419.46          | 634.22               |
| PcAMP03 | defensin_2                              | 0            | 659.06         | 309.20           | 123.43               |

**Peptides identified from PcAMP01**

| peptide sequence <sup>a</sup> | theor. [M+H] <sup>+b</sup> | exp. [M+H] <sup>+c</sup> | mass error (ppm) | peptide score | retention time (min) |
|-------------------------------|----------------------------|--------------------------|------------------|---------------|----------------------|
| QQPWEVSPNINR                  | 1467.7278                  | 1467.7339                | -4.2             | 8.9           | 35.13                |
| SLQPGAPDINNGK                 | 1310.6626                  | 1310.6699                | -5.6             | 7.7           | 25.51                |
| AKPTWHAGGTIR                  | 1294.7073                  | 1294.7015                | 4.5              | 8.6           | 21.07                |
| SLQPGAPDINNDKK                | 1496.7773                  | 1496.7703                | 4.6              | 8.0           | 23.55                |
| QQPWEVSPNINRDGAGNVR           | 2137.0648                  | 2137.0533                | 5.3              | 8.1           | 33.49                |
| DHDFNAGWGK                    | 1146.4921                  | 1146.4963                | -3.7             | 7.5           | 27.08                |
| SLQPGAPDINNDK                 | 1368.6796                  | 1368.6754                | 3.1              | 7.7           | 26.40                |
| TDIEVQNHGKDHDFNAGWGK          | 2268.0656                  | 2268.0428                | 10.0             | 6.7           | 33.71                |
| AKPTWHAGGTIR                  | 1294.701                   | 1294.7015                | -0.4             | 7.9           | 81.18                |
| TDIEVQNHGK                    | 1140.5675                  | 1140.5644                | 2.7              | 7.5           | 17.31                |
| SLQPGAPDINNGKK                | 1438.7498                  | 1438.7649                | -10.5            | 8.1           | 23.33                |
| TDIEVQNHGKDHDFNAGWGK          | 2268.1397                  | 2268.0428                | 42.7             | 7.2           | 41.40                |
| DHDFNAGWGK                    | 1146.5051                  | 1146.4963                | 7.7              | 7.4           | 80.92                |
| VSPNINRDGAGNVR                | 1468.7331                  | 1468.7615                | -19.3            | 6.6           | 45.14                |
| KQQPWEVSPNINR                 | 1595.8306                  | 1595.8289                | 1.1              | 8.5           | 31.31                |

**Peptides identified from PcAMP02**

| peptide sequence <sup>a</sup> | theor. [M+H] <sup>+b</sup> | exp. [M+H] <sup>+c</sup> | mass error (ppm) | peptide score | retention time (min) |
|-------------------------------|----------------------------|--------------------------|------------------|---------------|----------------------|
| LDYHTPSGSGAFIQADR             | 1935.9195                  | 1935.9259                | 3.3              | 9.0           | 32.93                |
| YNIYTSPK                      | 985.4989                   | 985.4993                 | 0.4              | 8.4           | 25.63                |
| KDFGVDATAQYQR                 | 1498.7285                  | 1498.7335                | 3.4              | 8.6           | 26.76                |
| NYGTDVAAGGK                   | 1052.5007                  | 1052.5005                | -0.2             | 8.2           | 20.54                |
| DFGVDATAQYQR                  | 1370.6335                  | 1370.6495                | 11.7             | 8.5           | 32.01                |
| GGRLDYHTPSGSGAFIQADR          | 2206.0636                  | 2206.0589                | -2.1             | 7.3           | 30.70                |
| TRNYGTDVAAGGK                 | 1309.6495                  | 1309.6444                | -3.9             | 7.4           | 80.87                |

### Peptides identified from PcAMP03

| peptide sequence <sup>a</sup> | theor. [M+H] <sup>+</sup> <sup>b</sup> | exp. [M+H] <sup>+</sup> <sup>c</sup> | mass error (ppm) | peptide score | retention time (min) |
|-------------------------------|----------------------------------------|--------------------------------------|------------------|---------------|----------------------|
| VTCDVLNFEIK                   | 1337.677                               | 1337.679                             | 1.5              | 6.4           | 42.09                |
| LNDAAACAAHCLTLGK              | 1614.7727                              | 1614.7946                            | 13.5             | 5.2           | 37.38                |

<sup>a</sup> C\*, C-carbamidomethylation; Mox, M-oxidation

<sup>b</sup> theoretical monoisotopic mass of the peptide

<sup>c</sup> calculated monoisotopic mass of the lock-mass corrected peptide ion cluster

**Table S3. Proteome analysis via shotgun from hemolymph of *P. chochleariae* larvae**

| protein         | fmol protein            |                                               |                                 |                                                       |                                  |
|-----------------|-------------------------|-----------------------------------------------|---------------------------------|-------------------------------------------------------|----------------------------------|
|                 | <i>gfp</i> not infected | <i>gfp</i> infected with <i>M. anisopliae</i> | <i>PcSOD3.1(-)</i> not infected | <i>PcSOD3.1(-)</i> infected with <i>M. anisopliae</i> | <i>PcSOD3.2 (-)</i> not infected |
| <i>PcSOD3.1</i> | 5.48 ± 3.67             | 3.76 ± 4.43                                   | 0                               | 0                                                     | 1.38 ± 2.75                      |
| <i>PcSOD3.2</i> | 14.49 ± 1.11            | 9.07 ± 3.33                                   | 16.25 ± 8.18                    | 8.77 ± 3.8                                            | 0                                |

**Table S4. Peptides identified from PcYellow-like in secretions of juvenile *P. cochleariae*.**

| peptide sequence <sup>a</sup> | theor. [M+H] <sup>+</sup> <sup>b</sup> | exp. [M+H] <sup>+</sup> <sup>c</sup> | mass error (ppm) | peptide score | retention time (min) |
|-------------------------------|----------------------------------------|--------------------------------------|------------------|---------------|----------------------|
| NNPFAAPQIFHTYR                | 1675.834                               | 1675.841                             | 4.4              | 8.6           | 40.78                |
| IHSGTPVTLGTVTDR               | 1553.828                               | 1553.831                             | 1.8              | 8.7           | 33.12                |
| QANIDGGYFR                    | 1140.543                               | 1140.546                             | 2.1              | 8.4           | 33.59                |
| TNHLLLR                       | 866.5207                               | 866.5207                             | 0.0              | 8.6           | 30.37                |
| LLAFDLR                       | 847.5036                               | 847.5021                             | -1.8             | 8.0           | 42.40                |
| QELWILTSR                     | 1145.631                               | 1145.633                             | 1.8              | 8.3           | 43.78                |
| NTFVYLG DVR                   | 1183.611                               | 1183.618                             | 5.9              | 8.0           | 39.71                |
| ITIDECER                      | 1035.478                               | 1035.483                             | 4.8              | 6.7           | 28.24                |
| STQSSAEAIDR                   | 1164.549                               | 1164.552                             | 2.1              | 8.0           | 23.61                |
| SWAVR                         | 618.3358                               | 618.3402                             | 7.1              | 7.2           | 28.49                |
| DLSIVHEWSQIEFDYHSEVER         | 2618.216                               | 2618.219                             | 1.0              | 7.8           | 47.43                |
| LWVIDIGPLNDVITCPAR            | 2052.095                               | 2052.1                               | 2.4              | 8.0           | 53.14                |
| STQSSAEAIDRDGIMYYGLLDIK       | 2603.266                               | 2603.338                             | 27.9             | 6.0           | 41.85                |
| RDSLIVHEWSQIEFDYHSEVER        | 2774.317                               | 2774.334                             | 6.3              | 6.0           | 45.35                |
| GRQELWILTSR                   | 1358.754                               | 1358.764                             | 7.7              | 8.2           | 40.53                |
| RLFYHAMSSPTENWVYTSYLR         | 2621.261                               | 2621.228                             | -12.3            | 6.3           | 30.43                |
| LFYHAMSSPTENWVYTSYLR          | 2481.154                               | 2481.164                             | 3.7              | 8.1           | 44.43                |

|                    |          |          |     |     |       |
|--------------------|----------|----------|-----|-----|-------|
| AQYVASGTMFDVNETNFR | 2065.928 | 2065.933 | 2.1 | 8.1 | 37.70 |
|--------------------|----------|----------|-----|-----|-------|

<sup>a</sup> C\*, C-carbamidomethylation; Mox, M-oxidation

<sup>b</sup> theoretical monoisotopic mass of the peptide

<sup>c</sup> calculated monoisotopic mass of the lock-mass corrected peptide ion cluster

**Table S5. Primer used for cloning, quantitative real time PCR, dsRNA production.**

| Primer type     | Target               | ↔             | Sequence                                                | Amplicon length         |    |
|-----------------|----------------------|---------------|---------------------------------------------------------|-------------------------|----|
| Coding sequence | <i>PcSOD1</i>        | →             | ATGCCTACAAAAGCAGTTTGC GTTCTC                            | 462                     |    |
|                 |                      | ←             | CTATATTTTTGCCAATCCAATGACTCCA                            |                         |    |
|                 | <i>PcSOD3.1</i>      | →             | GAGAAAAAATTTGATACTTCG                                   | 670                     |    |
|                 |                      | ←             | TTTTCACTTATCTAAAATCGTTTAT                               |                         |    |
|                 | <i>PcSOD3.2</i>      | →             | ATGTTCAAGTTTGTAGTAGCCGTGGTTT                            | 553                     |    |
|                 |                      | ←             | CTCCCTAATCGTAGGTTATTCATTCTTCC                           |                         |    |
| dsRNA template  | <i>PcSOD1</i>        | →             | TAATACGACTCACTATAGGGAGACTCCAATGTGGCGA<br>ATA            | 243                     |    |
|                 |                      | ←             | TAATACGACTCACTATAGGGAGATGCCTACAAAAGCA<br>GTT            |                         |    |
|                 | <i>PcSOD3.1</i>      | →             | TAATACGACTCACTATAGGGAGAACATCGTAGCCGAC<br>GCA            | 193                     |    |
|                 |                      | ←             | TAATACGACTCACTATAGGGAGACCGATGACCCCGCA<br>A              |                         |    |
|                 | <i>PcSOD3.2</i>      | →             | TAATACGACTCACTATAGGGAGAGACTCCGCAAGCTA<br>TAC            | 508                     |    |
|                 |                      | ←             | TAATACGACTCACTATAGGGAGACAAGTTTGTAGTAG<br>CCG            |                         |    |
|                 | <i>gfp</i>           | →             |                                                         | 523                     |    |
|                 |                      | ←             | TAATACGACTCACTATAGGGAGATAATCCCAGCAGCA<br>GTT            |                         |    |
|                 | <i>PcYellow-like</i> | →             | GTAATACGACTCACTATAGGGAGCTTTCTTGGCGTCA<br>CTGGTGGTAG     |                         |    |
|                 |                      | ←             | GTAATACGACTCACTATAGGGAGCCAGCAAACCATAA<br>TACATTATCCATCC |                         |    |
|                 | qPCR                 | <i>PcSOD1</i> | →                                                       | ATCATGATCTGGGCCACCATGC  | 77 |
|                 |                      |               | ←                                                       | ACAACACCAACGGGTGCATTTCC |    |
| <i>PcSOD3.1</i> |                      | →             | AAACATCGTAGCCGACGCAACAG                                 | 89                      |    |
|                 |                      | ←             | TGCCGATGATGTTGTGGTTGC                                   |                         |    |
| <i>PcSOD3.2</i> |                      | →             | TCAATGTGAGCGACGCCGAAAC                                  | 111                     |    |
|                 |                      | ←             | TGGACCTTCAATCCCCACAACG                                  |                         |    |
| <i>PcRP-L6</i>  |                      | →             | CAAGACAGGATCAGACCTAGAC                                  | 126                     |    |
|                 |                      | ←             | CACTCTCTTTCCTTTGTGGGAAC                                 |                         |    |
| <i>PcRP-S3</i>  |                      | →             | AAGGCTGTGAAGTTGTGGTATCTGG                               | 128                     |    |
|                 |                      | ←             | ATGGCGGGTGGCAGTGTCTAC                                   |                         |    |
| pET100 Insert   | <i>PcSOD1</i>        | →             | CACCATGCCTACAAAAGCAGTTTGC                               | 466                     |    |
|                 |                      | ←             | CTATATTTTTGCCAATCCAATGACT                               |                         |    |

|  |                 |   |                             |     |
|--|-----------------|---|-----------------------------|-----|
|  | <i>PcSOD3.1</i> | → | CACCATGCGTAGCGCAGTCGTCTATCT | 487 |
|  |                 | ← | AGCCAGAACGCGTATTTACTC       |     |
|  | <i>PcSOD3.2</i> | → | CACCGATGTGCATTTCAGCAACAGTT  | 478 |
|  |                 | ← | TCATTCTTCCAATACTTCGA        |     |

**Table S6. Accession numbers of sequences used for all the studies of this publication.**

| Species                         | Designation in figure | Accession number                |
|---------------------------------|-----------------------|---------------------------------|
| <i>Anoplophora glabripennis</i> | AglaSOD01             | gi 550258789 gb JAB66410.1      |
|                                 | AglaSOD02             | gi 550254905 gb JAB65445.1      |
| <i>Acyrtosiphon pisum</i>       | ApisSOD01             | gi 242247393 ref NP_001156153.1 |
|                                 | ApisSOD02             | gi 239789313 dbj BAH71287.1     |
|                                 | ApisSOD03             | gi 242247211 ref NP_001156243.1 |
| <i>Bombyx mori</i>              | BmorSOD01             | gi 112982998 ref NP_001037084.1 |
|                                 | BmorSOD02             | gi 512930962 ref XP_004932190.1 |
|                                 | BmorSOD03             | gi 512885538 ref XP_004921611.1 |
|                                 | BmorSOD04             | gi 68144076 gb AA86076.1        |
| <i>Chrysomela lapponica</i>     | CIBSOD01              | gb KT002136                     |
|                                 | CIBSOD02              | gb KT002134                     |
|                                 | CIBSOD03              | gb KT002135                     |
|                                 | CIBSOD04              | gb KT002137                     |
|                                 | CIBSOD05              | gb KT002138                     |
|                                 | CIWSOD01              | gb KT002139                     |
|                                 | CIWSOD02              | gb KT002140                     |
|                                 | CIWSOD03              | gb KT002141                     |
|                                 | CIWSOD04              | gb KT002142                     |
|                                 | CIWSOD05              | gb KT002143                     |
| <i>Chrysomela populi</i>        | CpSOD01               | gb KT270576                     |
|                                 | CpSOD02               | gb KT270577                     |
|                                 | CpSOD03               | gb KT270578                     |
|                                 | CpSOD04               | gb KT270579                     |
|                                 | CpSOD05               | gb KT270580                     |
| <i>Phaedon cochleariae</i>      | PcSOD1                | gb KT002146                     |
|                                 | PcSOD3.1              | gb JQ424878                     |
|                                 | PcSOD3.2              | gb KT002145                     |
|                                 | PcSOD3.3              | gb KT002144                     |
|                                 | PcSOD04               | gb KT270585                     |
|                                 | PcAMP01               | gb KT270583                     |
|                                 | PcAMP02               | gb KT270582                     |
|                                 | PcAMP03               | gb KT270581                     |
| PcYellow-like                   | gb KT270584           |                                 |
| PcRPL6                          | gb KT270586           |                                 |

|                                       |           |                                 |
|---------------------------------------|-----------|---------------------------------|
|                                       | PcRPS3    | gb KC109783                     |
|                                       |           |                                 |
| <b><i>Dastarcus helophoroides</i></b> | DhelSOD01 | gi 667755291 gb AIG92782.1      |
|                                       | DhelSOD02 | gi 667755289 gb AIG92781.1      |
|                                       | DhelSOD03 | gi 667755293 gb AIG92783.1      |
|                                       |           |                                 |
| <b><i>Drosophila melanogaster</i></b> | DmelSOD1  | Q7JR71 Q7JR71_DROME             |
|                                       | DmelSOD3  | gi 17136496 ref NP_476735.1     |
|                                       |           |                                 |
| <b><i>Dendroctonus ponderosae</i></b> | DponSOD01 | gi 546674530 gb ERL85890.1      |
|                                       | DponSOD02 | gi 478251452 gb ENN71916.1      |
|                                       | DponSOD03 | gi 332380651 gb AEE65524.1      |
|                                       | DponSOD04 | gi 332376316 gb AEE63298.1      |
|                                       | DponSOD05 | gi 332376945 gb AEE63612.1      |
|                                       | DponSOD06 | gi 478253114 gb ENN73487.1      |
|                                       |           |                                 |
| <b><i>Homo sapiens</i></b>            | HspSOD1   | P00441 SODC_HUMAN               |
|                                       | HspSOD3   | P08294 SODE_HUMAN               |
|                                       |           |                                 |
| <b><i>Leptopilina boulardi</i></b>    | LbouSOD01 | gi 357535425 gb AET83767.1      |
|                                       | LbouSOD02 | gi 357535429 gb AET83769.1      |
|                                       | LbouSOD03 | gi 357535423 gb AET83766.1      |
|                                       | LbouSOD04 | gi 357535431 gb AET83770.1      |
|                                       | LbouSOD05 | gi 357535433 gb AET83771.1      |
|                                       | LbouSOD06 | gi 506969309 gb AGM32998.1      |
|                                       |           |                                 |
| <b><i>Lygus hesperus</i></b>          | LhesSOD01 | gi 732607915 gb JAG19381.1      |
|                                       | LhesSOD02 | gi 732607911 gb JAG19379.1      |
|                                       | LhesSOD03 | gi 732613469 gb JAG22158.1      |
|                                       | LhesSOD04 | gi 732610069 gb JAG20458.1      |
|                                       | LhesSOD05 | gi 732576017 gb JAG03432.1      |
|                                       | LhesSOD06 | gi 732622201 gb JAG26524.1      |
|                                       |           |                                 |
| <b><i>Mus musculus</i></b>            | MmusSOD1  | sp P08228 SODC_MOUSE            |
|                                       | MmusSOD3  | sp O09164 SODE_MOUSE            |
|                                       |           |                                 |
| <b><i>Nasonia vitripennis</i></b>     | NvitSOD01 | gi 156548615 ref XP_001608103.1 |
|                                       | NvitSOD02 | gi 345481696 ref XP_001602916.2 |
|                                       | NvitSOD03 | gi 645035824 ref XP_008216838.1 |
|                                       | NvitSOD04 | gi 645035835 ref XP_008216841.1 |
|                                       | NvitSOD05 | gi 645035832 ref XP_008216840.1 |
|                                       |           |                                 |
| <b><i>Panstrongylus megistus</i></b>  | PmegSOD01 | gi 656761599 gb JAC85673.1      |
|                                       | PmegSOD02 | gi 656761385 gb JAC85566.1      |
|                                       |           |                                 |
| <b><i>Solenopsis invicta</i></b>      | SinvSOD01 | gi 322782495 gb EFZ10444.1      |
|                                       | SinvSOD02 | gi 322782511 gb EFZ10460.1      |
|                                       |           |                                 |



|                                       |           |                             |
|---------------------------------------|-----------|-----------------------------|
| <b><i>Tribolium castaneum</i></b>     | TcasSOD01 | D6X0S2 D6X0S2_TRICA         |
|                                       | TcasSOD02 | D2A2T2 D2A2T2_TRICA         |
|                                       | TcasSOD03 | gi 91091194 ref XP_972244.1 |
|                                       |           |                             |
| <b><i>Tenebrio molitor</i></b>        | TmolSOD01 | gi 669688118 gb AII26027.1  |
|                                       | TmolSOD02 | gi 669688116 gb AII26026.1  |
|                                       |           |                             |
| <b><i>Streptomyces coelicolor</i></b> | ScoeSOD   | O51917 SODF_STRCO           |
